# Supplementary material for: Helicobacter pylori Vacuolating Cytotoxin A Causes Anorexia and Anxiety via Hypothalamic Urocortin 1 in Mice
Source: PubMed Central journal article supplement (PMC6461611; doi:10.1038/s41598-019-42163-4), 2019-04-12
Supplement: 41598_2019_42163_MOESM1_ESM.pdf [file 41598_2019_42163_MOESM1_ESM.pdf]

Supplementary Information

***Helicobacter pylori* Vacuolating Cytotoxin A Causes Anorexia and Anxiety via Hypothalamic Urocortin 1 in Mice**

Hajime Suzuki, Koji Ataka, Akihiro Asakawa, Kai-Chun Cheng, Miharu Ushikai, Haruki Iwai, Takakazu Yagi, Takeshi Arai, Kinnosuke Yahiro, Katsuhiro Yamamoto, Yoshito Yokoyama, Masayasu Kojima, Toshihiko Yada, Toshiya Hirayama, Norifumi Nakamura, and Akio Inui

Figure legend

**Fig. S1. Ct values of GAPDH in hypothalamus samples.** There were no significant differences in Ct values of GAPDH in our experiments. The expressions of GAPDH were stable in these hypothalamus samples.

Fig.S1

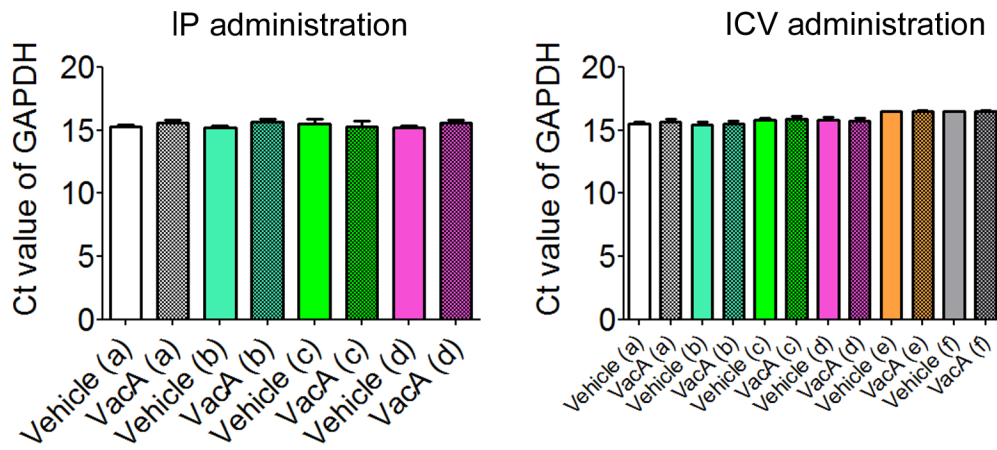

a: AgRP, NPY, CRF, POMC, CART  
b: OXT, Ucn1, Ucn2, Ucn3, AVP  
c: Orexin, MCH  
d: LRP1

a: AgRP, NPY, CRF  
b: OXT, AVP, LRP1  
c: POMC, CART, Ucn3  
d: Ucn1, Ucn2  
e: Orexin  
f: MCH

Supplementary Table 1

|                                                      |              | Forward                   | Reverse                 |
|------------------------------------------------------|--------------|---------------------------|-------------------------|
| agouti-related peptide (AgRP)                        | NM_001271806 | GCGGCCTGAAAGCTTTGTC       | TCCTGTAGCCAGGGCATGAG    |
| neuropeptide Y (NPY)                                 | NM_023456    | CGCTCTGCGACACTACATCAAT    | TGAGATGAGGGTGGAAACTTGG  |
| melanin-concentrating hormone (MCH)                  | NM_029971    | AAACGACGAGAGCGGTTTCA      | TTCCTGTGTGGACTCAGCATTC  |
| orexin                                               | NM_010410.2  | CGTAACTACCACCGCTTTAGCA    | TGCCATTTACCAAGAGACTGACA |
| proopiomelanocortin (POMC)                           | NM_001278581 | AGAGGCCACTGAACATCTTTGTC   | TCTATGGAGGTCTGAAGCAGGAG |
| cocaine- and amphetamine-regulated transcript (CART) | NM_013732    | TCAAGAGTAAACGCATTCCGATCTA | TCCTCACTGCGCACTGCTCT    |
| corticotropin-releasing factor (CRF)                 | NM_205769    | CAGAGCCCAAGTACGTTGAGAG    | GCTCTCTTCTCCTCCCTTGGTA  |

|                                                           |           |                         |                        |
|-----------------------------------------------------------|-----------|-------------------------|------------------------|
| urocortin1 (Ucn1)                                         | NM_021290 | CATCTTGCACTGGGCAGACACT  | AAGCTGTGCCAAGAGCAGCAAC |
| Ucn2                                                      | NM_145077 | ATGTTTGGGCATCTTGGACTCT  | GCCTGTGGACCTTAGATGGACT |
| Ucn3                                                      | NM_031250 | ACCAGAGAAGACAAAGCTGCAA  | GAAGTGGCAGCAGGAAGTAGGT |
| oxytocin (OXT)                                            | NM_011025 | TGCCAGGAGGAGAACTACCTG   | TATCCCAGAAAGTGGGCTCAG  |
| arginine vasopressin (AVP)                                | NM_009732 | TCTCTGACATGGAGCTGAGACAG | AGGGCAGGTAGTTCTCCTCCT  |
| low-density lipoprotein receptor-related protein-1 (LRP1) | NM_008512 | TCGGCAGACCATCATCCAAG    | ATTGTCCGAGTTGGTGGCGTA. |
| glyceraldehyde-3-phosphate dehydrogenase (GAPDH)          | NM_008084 | CTACAGCAACAGGGTGGTGGAC  | GGATAGGGCCTCTCTTGCTCAG |

Table S2

| Primary antibody                                                        | Secondary antibody                                                                                                  |
|-------------------------------------------------------------------------|---------------------------------------------------------------------------------------------------------------------|
| NTS sections                                                            |                                                                                                                     |
| c-Fos (ABE 475, Merck Millipore, Billerica, MA, 1:1,000)                | Biotinylated anti-rabbit IgG (Vector Laboratories, Burlingame, CA, 1:200)                                           |
| Hypothalamus sections                                                   |                                                                                                                     |
| c-Fos (sc-52-G, Santa Cruz Biotechnology, Dallas, TX, 1:1,000)          | Alexa Fluor 647-conjugated anti-goat IgG<br>(Jackson ImmunoResearch Laboratories Inc., West Grove, PA, 1:500)       |
| Urocortin1, rabbit serum (Y362, Yanaihara Inc., Shizuoka, Japan, 1:100) | Alexa Fluor 555-conjugated anti-rabbit IgG<br>(Abcam, Cambridge, MA, 1:200)                                         |
| VacA (a generous gift from Dr. Hisao Kurazono, 1:1,000)                 | Alexa Fluor 555-conjugated anti-rabbit IgG<br>(Abcam, Cambridge, MA, 1:500)                                         |
| PGP9.5 (GP14104, Neuromics, Edina, MN, 1:1,000)                         | Alexa Fluor 488-conjugated anti-guinea pig IgG<br>(Jackson ImmunoResearch Laboratories Inc., West Grove, PA, 1:200) |
